# Supplementary material
Source: publisher figshare collection journal article supplement (https://karger.figshare.com/ndownloader/files/23581865)
Supplement: Supplementary file 1 [file 23581865]

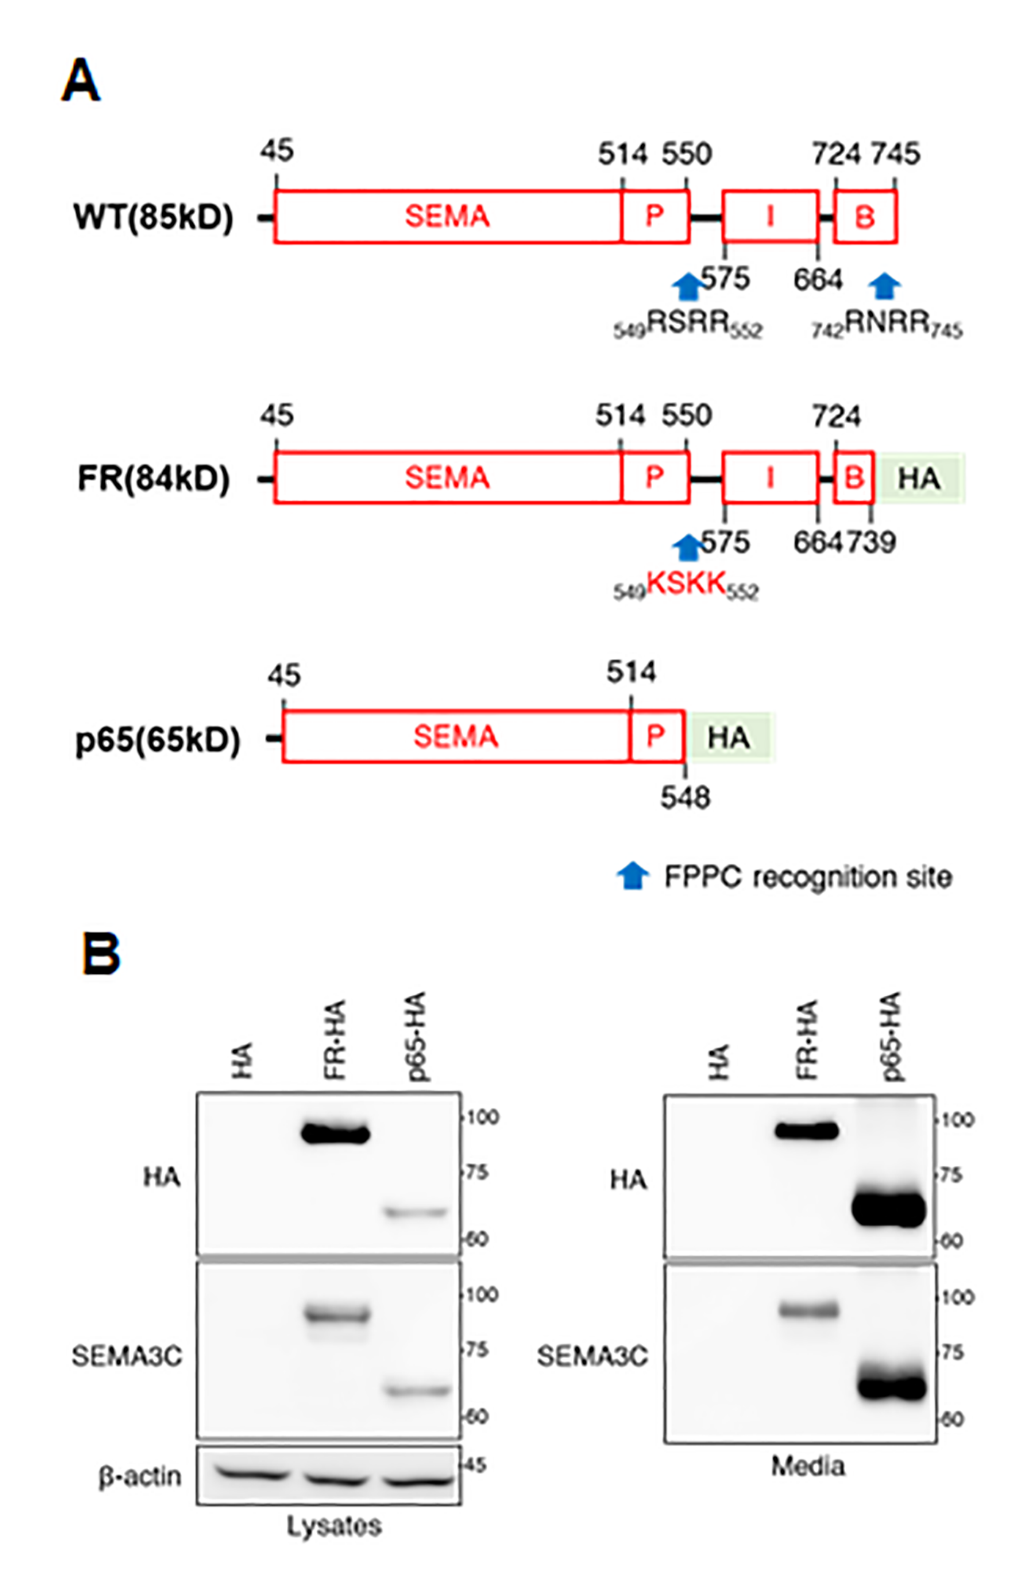


Supplementary Fig. 3. Generation and validation of human SEMA3C mutant constructs (A) Schematic illustration of the generated SEMA3C mutant constructs. Wild type SEMA3C (WT) contains two recognition sites by FPPCs at 549th-552nd and 742nd-745th amino acid. In accordance with the design in Yelena Mumblat, *at al.* [[1](#_ENREF_1)], FPPC-resistant SEMA3C (FR) contains point mutation at 549th-552nd (RSRR to KSKK) and is truncated at 739th amino acid. Truncated SEMA3C (p65) only contains 1st-548th amino acid. SEMA, SEMA domain; P, Plexin-Semaphorin-Integrin domain; I, Immunoglobulin-like domain; B, Basic domain. (B) Protein expressions in both lysate and media were confirmed in HEK293T because this cell line shows undetectable level of endogenous SEMA3C [[2](#_ENREF_2)]. As the produced mutants were tagged with HA at C-terminal end, antibodies against both HA and SEMA3C were used for band detection. After transfection to HEK293T, cell lysates and supernatants were loaded in SDS-PAGE.

**References**

1. Mumblat Y, Kessler O, Ilan N, Neufeld G. Full-Length Semaphorin-3C Is an Inhibitor of Tumor Lymphangiogenesis and Metastasis. Cancer research. 2015 Jun 1;75(11):2177-86.

2. Esselens C, Malapeira J, Colome N, Casal C, Rodriguez-Manzaneque JC, Canals F, et al. The cleavage of semaphorin 3C induced by ADAMTS1 promotes cell migration. The Journal of biological chemistry. 2010 Jan 22;285(4):2463-73.
